# Supplementary material for: High Expression of miR-34a Associated with Less Aggressive Cancer Biology but Not with Survival in Breast Cancer
Source: MDPI journal article supplement (doi:10.3390/ijms21093045), 2020-04-26
Supplement: s1 [file s1]

Supplementary Table 1. Clinicopathological demographics of the miR-34a High and miR-34a Low groups in TCGA cohort.

| Clinicopathological Factor   | Whole Cohort (n = 755)  |                        | p value |
|------------------------------|-------------------------|------------------------|---------|
|                              | miR-34a High<br>n = 377 | miR-34a Low<br>n = 378 |         |
| <b>Age</b>                   |                         |                        |         |
| <65 y                        | 250                     | 98                     | 0.0257  |
| ≥65 y                        | 127                     | 279                    |         |
| Unknown                      | 0                       | 1                      |         |
| <b>Stage</b>                 |                         |                        |         |
| 1                            | 68                      | 69                     | 0.432   |
| 2                            | 215                     | 215                    |         |
| 3                            | 83                      | 88                     |         |
| 4                            | 7                       | 2                      |         |
| Unknown                      | 4                       | 4                      |         |
| <b>T category</b>            |                         |                        |         |
| 1                            | 99                      | 113                    | 0.067   |
| 2                            | 220                     | 203                    |         |
| 3                            | 41                      | 55                     |         |
| 4                            | 16                      | 7                      |         |
| Unknown                      | 1                       | 0                      |         |
| <b>Lymph node metastasis</b> |                         |                        |         |
| Negative                     | 180                     | 177                    | 0.826   |
| Positive                     | 191                     | 196                    |         |
| Unknown                      | 6                       | 5                      |         |
| <b>ER Status</b>             |                         |                        |         |
| Negative                     | 88                      | 77                     | 0.215   |
| Positive                     | 260                     | 284                    |         |
| Unknown                      | 29                      | 17                     |         |
| <b>PgR Status</b>            |                         |                        |         |
| Negative                     | 120                     | 104                    | 0.107   |
| Positive                     | 227                     | 256                    |         |
| Unknown                      | 30                      | 18                     |         |
| <b>HER2 Status</b>           |                         |                        |         |
| Negative                     | 257                     | 278                    | 0.32    |
| Positive                     | 66                      | 58                     |         |
| Unknown                      | 54                      | 42                     |         |
| <b>PAM 50 classification</b> |                         |                        |         |
| Normal                       | 10                      | 6                      | < 0.001 |
| Luminal A                    | 101                     | 149                    |         |
| Luminal B                    | 74                      | 40                     |         |
| HER2                         | 25                      | 18                     |         |
| Basal                        | 42                      | 41                     |         |
| Unknown                      | 125                     | 124                    |         |
| <b>Histologic subtype</b>    |                         |                        |         |
| Invasive Ductal              | 272                     | 246                    | 0.002   |

|                                    |    |     |
|------------------------------------|----|-----|
| Carcinoma                          |    |     |
| Invasive Lobular Carcinoma         | 67 | 109 |
| Mixed Ductal and Lobular Carcinoma | 10 | 8   |
| Other                              | 22 | 12  |
| Unknown                            | 6  | 3   |

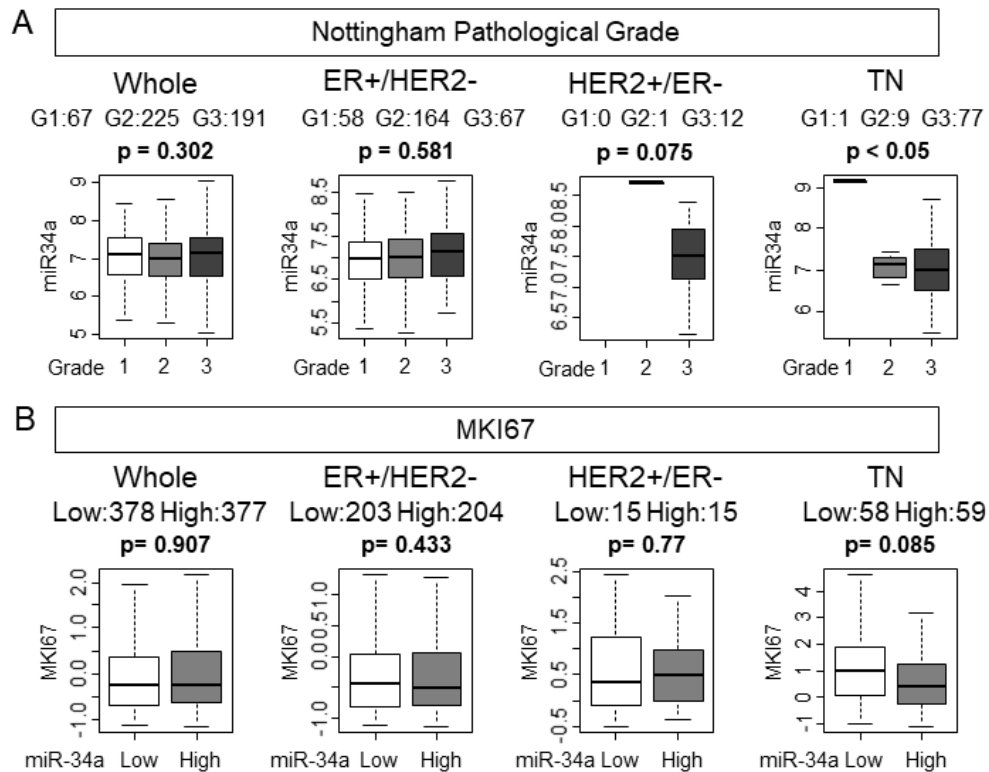

**Supplementary Figure S1:** The association of miR-34a expression with Nottingham pathological grade and the expression of MKI67 in TCGAC cohort. (A) Association between miR-34a expression levels and Nottingham pathological grade in whole cohort and each subtype. (B) Association between expression levels of miR-34a and MKI67 expression in whole cohort and each subtype.

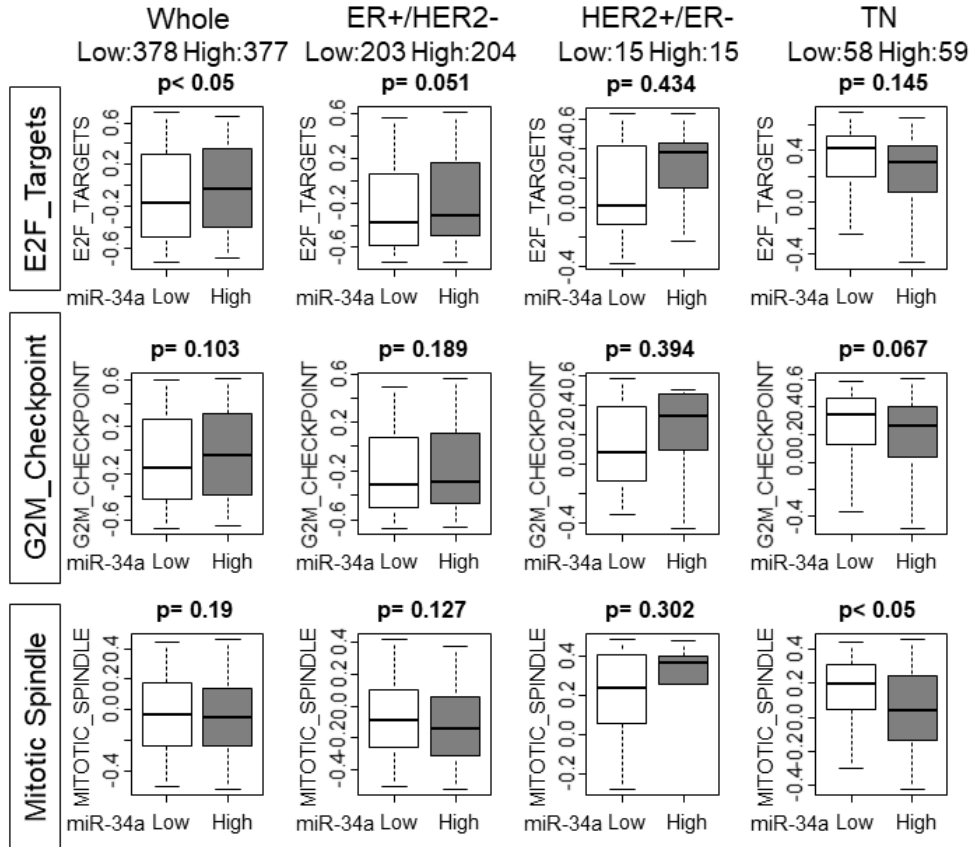

**Supplementary Figure S2:** The association of High MiR-34a expression with gene sets variation analysis (GSVA) scores of the gene sets related to cell cycle or cell proliferation in whole TCGA cohort and each subtype. Upper row: E2F\_Targets, middle row: G2M\_Checkpoint, lower row: Mitotic\_Spindle Hallmark gene sets. GSVA, Gene Set Variant Analysis.

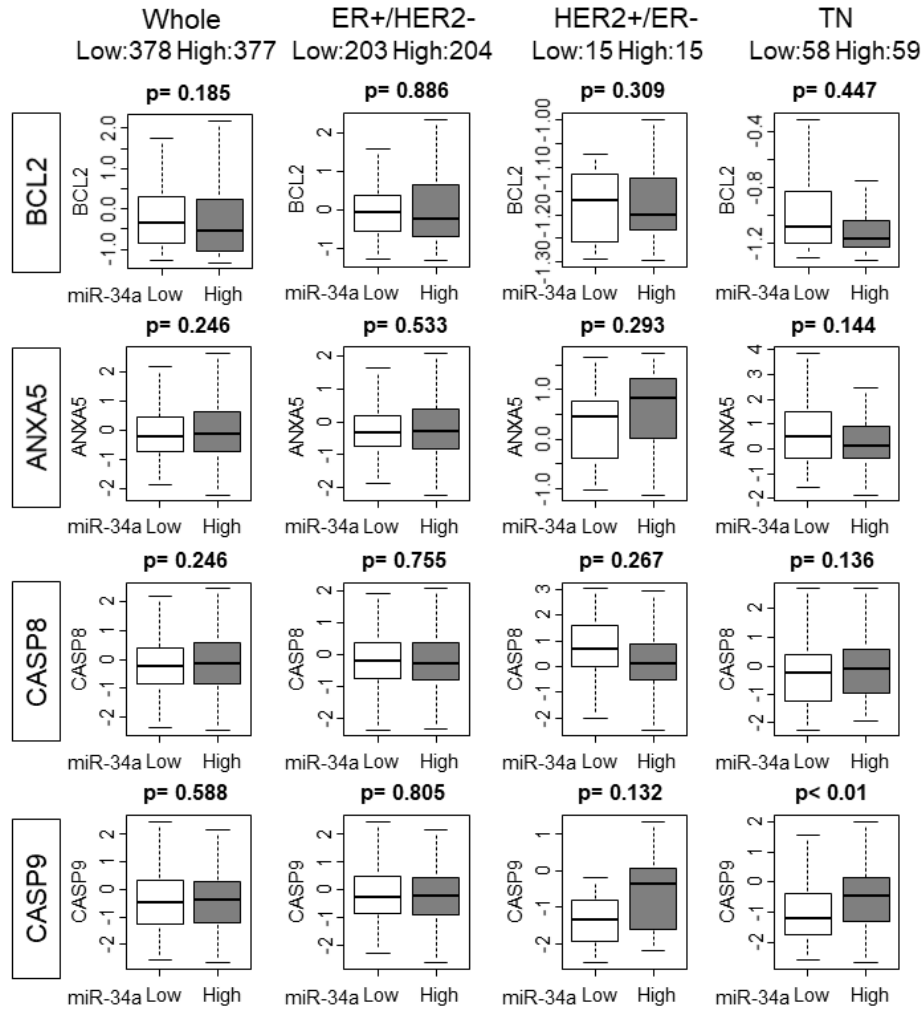

**Supplementary Figure S3:** The association of High MiR-34a expression with the expression of apoptosis-related genes in whole cohort and ER+/HER2-, HER2+/ER-, and TN subtypes of TCGA cohort.

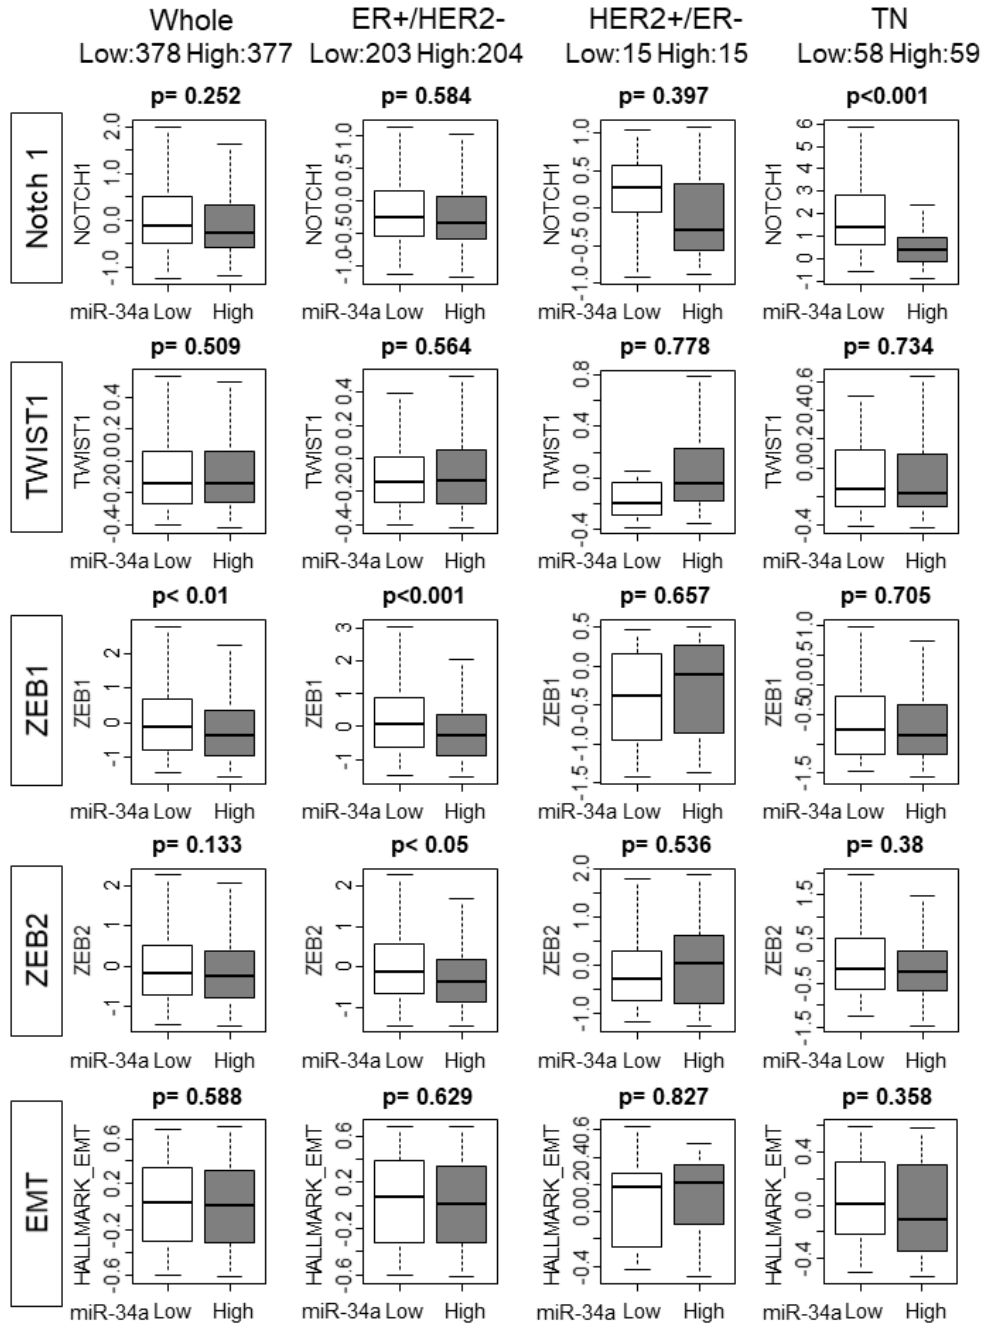

**Supplementary Figure S4:** The association of High MiR-34a expression with the epithelial–mesenchymal transition (EMT) score. Each row has TCGA whole cohort, and each subtype. Top row: Notch 1 expression by miR-34a expression. Second row: TWIST 1 expression by miR-34a expression. Third row ZEB 1 expression by miR-34a expression. Fourth row: ZEB 2 expression by miR-34a. Bottom row: GSEA Hallmark EMT score by miR-34a expression. EMT, epithelial–mesenchymal transition.

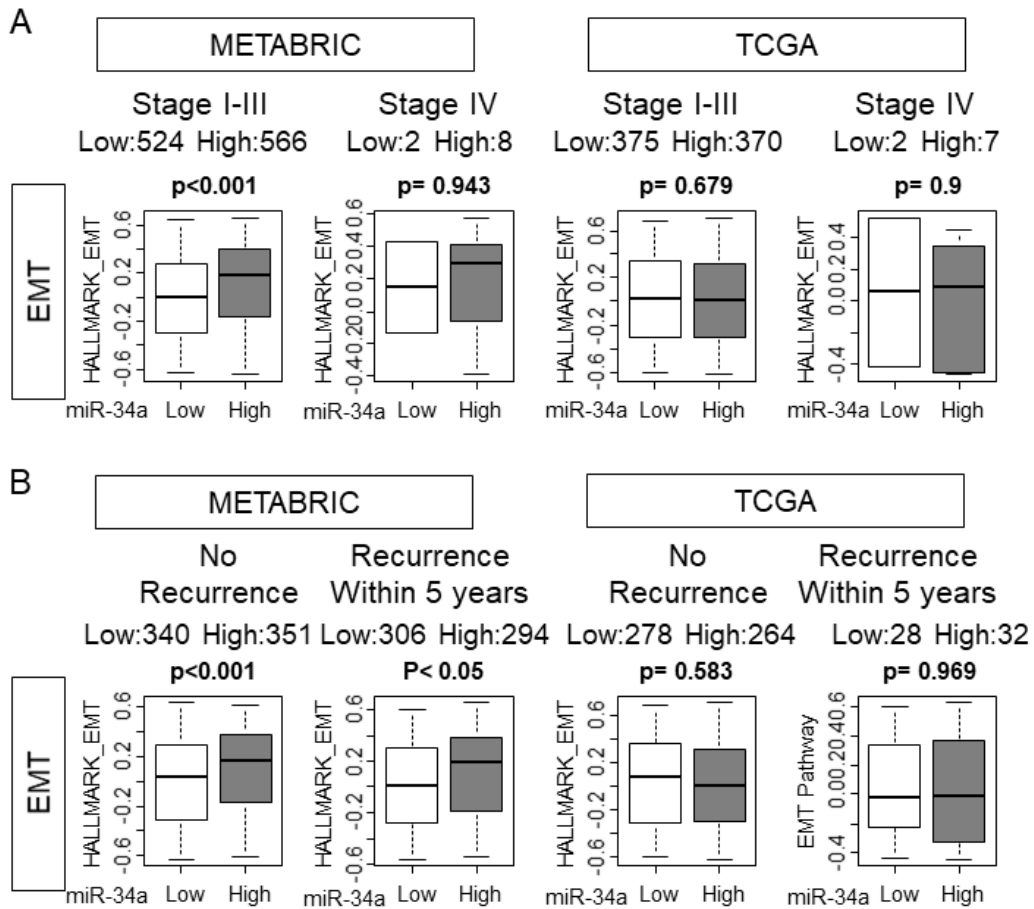

**Supplementary Figure S5:** High MiR-34a expression tumors were associated with higher epithelial–mesenchymal transition (EMT) score with the patients with Stage I-III, no recurrence over 5 years, recurrence within 5 years. (A) EMT expression by miR-34a expression
